# Supplementary material for: Vaccine Resistance and Hesitancy among Older Adults Who Live Alone or Only with an Older Partner in Community in the Early Stage of the Fifth Wave of COVID-19 in Hong Kong
Source: MDPI journal article supplement (doi:10.3390/vaccines10071118), 2022-07-13
Supplement: s1 [file s1]

**Supplement Table S1. Factors associated with vaccine uptake resistance among older people who live alone or only with an older partner in Hong Kong (N=1782)**

| Multivariate regression*                              |      |        |      |                  |
|-------------------------------------------------------|------|--------|------|------------------|
| Variables                                             | aOR  | 95% CI |      | P                |
| <b>Age (years)</b>                                    |      |        |      |                  |
| Mean (SD)                                             | 1.04 | 1.02   | 1.05 | <b>&lt;0.001</b> |
| <b>Sex</b>                                            |      |        |      |                  |
| Male                                                  | Ref  |        |      |                  |
| Female                                                | 0.85 | 0.68   | 1.06 | 0.158            |
| <b>Living status</b>                                  |      |        |      |                  |
| Live with an older partner                            | Ref  |        |      |                  |
| Live alone                                            | 1.35 | 1.08   | 1.71 | <b>0.008</b>     |
| <b>Occupational status</b>                            |      |        |      |                  |
| Retirement                                            | Ref  |        |      |                  |
| Caring family/full-time/part-time/unemployed          | 0.76 | 0.44   | 1.32 | 0.332            |
| <b>Social security support</b>                        |      |        |      |                  |
| No                                                    | Ref  |        |      |                  |
| Yes (CSSA or OALA)                                    | 1.03 | 0.80   | 1.31 | 0.833            |
| <b>Number of doctor-diagnosed chronic conditions</b>  |      |        |      |                  |
| 0-1                                                   | Ref  |        |      |                  |
| 2-3                                                   | 0.99 | 0.78   | 1.26 | 0.961            |
| >3                                                    | 1.56 | 1.15   | 2.12 | <b>0.005</b>     |
| <b>Ever hospital admission over the past 6 months</b> |      |        |      |                  |
| No                                                    | Ref  |        |      |                  |
| Yes                                                   | 1.17 | 0.87   | 1.56 | 0.301            |
| <b>Regular measurement of blood glucose</b>           |      |        |      |                  |
| No diabetes                                           | Ref  |        |      |                  |
| Yes                                                   | 1.18 | 0.89   | 1.55 | 0.248            |
| Not measure regularly                                 | 1.17 | 0.83   | 1.64 | 0.366            |
| <b>Help available when needed</b>                     |      |        |      |                  |
| Yes                                                   | Ref  |        |      |                  |
| No                                                    | 1.18 | 0.92   | 1.51 | 0.197            |
| <b>Number of social media use in the past 2 weeks</b> |      |        |      |                  |
| 0                                                     | Ref  |        |      |                  |
| 1                                                     | 0.68 | 0.53   | 0.87 | <b>0.003</b>     |
| >1                                                    | 0.45 | 0.32   | 0.64 | <b>&lt;0.001</b> |
| <b>Self-rated Health status in score</b>              |      |        |      |                  |
| High (67-100)                                         | Ref  |        |      |                  |
| Middle (34-66)                                        | 1.42 | 1.09   | 1.85 | <b>0.009</b>     |
| Low (0-33)                                            | 1.57 | 1.21   | 2.05 | <b>0.001</b>     |
| <b>Meaning of life</b>                                |      |        |      |                  |
| High (5-7)                                            | Ref  |        |      |                  |
| Middle (3-4)                                          | 1.22 | 0.96   | 1.55 | 0.107            |
| Low (1-2)                                             | 1.17 | 0.68   | 2.02 | 0.575            |
| Missing data                                          | 1.33 | 0.97   | 1.81 | 0.074            |
| <b>Loneliness (measured by UCLA-3)</b>                |      |        |      |                  |
| 0-5                                                   | Ref  |        |      |                  |
| ≥6                                                    | 1.07 | 0.79   | 1.43 | 0.681            |
| <b>Memory loss</b>                                    |      |        |      |                  |

|                                       |      |      |      |       |
|---------------------------------------|------|------|------|-------|
| No                                    | Ref  |      |      |       |
| Yes, but not worry                    | 0.87 | 0.69 | 1.10 | 0.251 |
| Yes, and worry                        | 0.99 | 0.71 | 1.39 | 0.970 |
| <b>Depression (measured by PHQ-2)</b> |      |      |      |       |
| 0-2                                   | Ref  |      |      |       |
| ≥3                                    | 1.31 | 0.77 | 2.22 | 0.319 |
| <b>Anxiety (measured by GAD-2)</b>    |      |      |      |       |
| 0-2                                   | Ref  |      |      |       |
| ≥3                                    | 1.26 | 0.70 | 2.27 | 0.432 |

\*Multivariate regression: adjusted for age, sex, living status, occupational status, social security support, number of chronic conditions, hospital admission, regular measurement of blood glucose, help available when needed, number of social medial use, self-rated health status, meaning in life, loneliness, memory loss, depression and anxiety.

**Supplement Table S2 Factors associated with vaccine hesitancy among older people who live alone or only with an older partner in Hong Kong (N=1384)**

| Multivariate regression*                              |      |        |      |              |
|-------------------------------------------------------|------|--------|------|--------------|
| Variables                                             | aOR  | 95% CI |      | P            |
| <b>Age (years)</b>                                    |      |        |      |              |
| Mean (SD)                                             | 1.02 | 1.00   | 1.04 | <b>0.044</b> |
| <b>Sex</b>                                            |      |        |      |              |
| Male                                                  | Ref  |        |      |              |
| Female                                                | 1.19 | 0.88   | 1.60 | 0.264        |
| <b>Living status</b>                                  |      |        |      |              |
| Live with an older partner                            | Ref  |        |      |              |
| Live alone                                            | 1.24 | 0.93   | 1.65 | 0.149        |
| <b>Occupational status</b>                            |      |        |      |              |
| Retirement                                            | Ref  |        |      |              |
| Caring family/full-time/part-time/unemployed          | 0.48 | 0.22   | 1.04 | 0.062        |
| <b>Social security support</b>                        |      |        |      |              |
| No                                                    | Ref  |        |      |              |
| Yes (CSSA or OALA)                                    | 0.95 | 0.70   | 1.30 | 0.766        |
| <b>Number of doctor-diagnosed chronic conditions</b>  |      |        |      |              |
| 0-1                                                   | Ref  |        |      |              |
| 2-3                                                   | 1.16 | 0.86   | 1.58 | 0.331        |
| >3                                                    | 1.53 | 1.03   | 2.27 | <b>0.035</b> |
| <b>Ever hospital admission over the past 6 months</b> |      |        |      |              |
| No                                                    | Ref  |        |      |              |
| Yes                                                   | 1.45 | 1.01   | 2.08 | <b>0.043</b> |
| <b>Regular measurement of blood glucose</b>           |      |        |      |              |
| No diabetes                                           | Ref  |        |      |              |
| Yes                                                   | 0.95 | 0.66   | 1.35 | 0.753        |
| Not measure regularly                                 | 0.60 | 0.36   | 1.01 | 0.052        |
| <b>Help available when needed</b>                     |      |        |      |              |
| Yes                                                   | Ref  |        |      |              |
| No                                                    | 1.00 | 0.72   | 1.38 | 0.977        |
| <b>Number of social media use in the past 2 weeks</b> |      |        |      |              |
| 0                                                     | Ref  |        |      |              |
| 1                                                     | 0.72 | 0.52   | 0.99 | <b>0.044</b> |
| >1                                                    | 0.55 | 0.36   | 0.85 | <b>0.006</b> |
| <b>Self-rated Health status in score</b>              |      |        |      |              |
| High (67-100)                                         | Ref  |        |      |              |
| Middle (34-66)                                        | 1.72 | 1.23   | 2.40 | <b>0.001</b> |
| Low (0-33)                                            | 1.51 | 1.06   | 2.13 | <b>0.022</b> |
| <b>Meaning of life</b>                                |      |        |      |              |
| High (5-7)                                            | Ref  |        |      |              |
| Middle (3-4)                                          | 0.89 | 0.65   | 1.22 | 0.467        |
| Low (1-2)                                             | 0.92 | 0.43   | 1.93 | 0.815        |
| Missing                                               | 1.32 | 0.90   | 1.94 | 0.152        |
| <b>Loneliness (measured by UCLA-3)</b>                |      |        |      |              |
| 0-5                                                   | Ref  |        |      |              |
| ≥6                                                    | 1.24 | 0.85   | 1.81 | 0.274        |
| <b>Memory loss</b>                                    |      |        |      |              |

|                                       |      |      |      |       |
|---------------------------------------|------|------|------|-------|
| No                                    | Ref  |      |      |       |
| Yes, but not worry                    | 1.00 | 0.73 | 1.37 | 0.999 |
| Yes, and worry                        | 1.31 | 0.85 | 2.02 | 0.217 |
| <b>Depression (measured by PHQ-2)</b> |      |      |      |       |
| 0-2                                   | Ref  |      |      |       |
| ≥3                                    | 0.60 | 0.28 | 1.31 | 0.198 |
| <b>Anxiety (measured by GAD-2)</b>    |      |      |      |       |
| 0-2                                   | Ref  |      |      |       |
| ≥3                                    | 1.27 | 0.55 | 2.93 | 0.571 |

\*Multivariate regression: adjusted for age, sex, living status, occupational status, social security support, number of chronic conditions, hospital admission, regular measurement of blood glucose, help available when needed, number of social medial use, self-rated health status, meaning in life, loneliness, memory loss, depression and anxiety.

**Supplement Table S3. Characteristics of subjects stratified by older adults who live alone or only with an older partner with different levels of meaning of life in Hong Kong**

| Variables                                            | High<br>(score 6-7) |      | Middle<br>(score 4-5) |      | Low<br>(score 1-3) |      | Missing data |      | P*               |
|------------------------------------------------------|---------------------|------|-----------------------|------|--------------------|------|--------------|------|------------------|
|                                                      | N=416               | %    | N=1146                | %    | N=231              | %    | N=316        | %    |                  |
| <b>Age (years)</b>                                   |                     |      |                       |      |                    |      |              |      |                  |
| Mean (SD)                                            | 78.3                | 7.5  | 79.5                  | 7.6  | 79.7               | 8.0  | 79.7         | 7.5  | <b>0.035</b>     |
| <b>Sex</b>                                           |                     |      |                       |      |                    |      |              |      |                  |
| Male                                                 | 138                 | 33.2 | 335                   | 29.2 | 75                 | 32.5 | 101          | 32.0 | 0.404            |
| Female                                               | 278                 | 66.8 | 811                   | 70.8 | 156                | 67.5 | 215          | 68.0 |                  |
| <b>Living status</b>                                 |                     |      |                       |      |                    |      |              |      |                  |
| Doubleton                                            | 166                 | 39.9 | 418                   | 36.5 | 85                 | 36.8 | 106          | 33.5 | 0.360            |
| Singleton                                            | 250                 | 60.1 | 728                   | 63.5 | 146                | 63.2 | 210          | 66.5 |                  |
| <b>Occupational status</b>                           |                     |      |                       |      |                    |      |              |      |                  |
| Retirement                                           | 387                 | 93.0 | 1100                  | 96.0 | 224                | 97.0 | 296          | 93.7 | 0.084            |
| Caring family /Full-time/part-time/unemployed        | 27                  | 6.5  | 46                    | 4.0  | 6                  | 2.6  | 13           | 4.1  |                  |
| Missing                                              | 2                   | 0.5  | 0                     | 0.0  | 1                  | 0.4  | 7            | 2.2  |                  |
| <b>Social security support</b>                       |                     |      |                       |      |                    |      |              |      |                  |
| No                                                   | 103                 | 24.8 | 257                   | 22.4 | 56                 | 24.2 | 72           | 22.8 | 0.772            |
| Yes (CSSA or OALA)                                   | 313                 | 75.2 | 889                   | 77.6 | 175                | 75.8 | 244          | 77.2 |                  |
| <b>Number of doctor-diagnosed chronic conditions</b> |                     |      |                       |      |                    |      |              |      |                  |
| 0-1                                                  | 185                 | 44.5 | 384                   | 33.5 | 79                 | 34.2 | 101          | 32.0 | <b>&lt;0.001</b> |
| 2-3                                                  | 168                 | 40.4 | 511                   | 44.6 | 95                 | 41.1 | 130          | 41.1 |                  |
| >3                                                   | 60                  | 14.4 | 249                   | 21.7 | 55                 | 23.8 | 83           | 26.3 |                  |
| Missing                                              | 3                   | 0.7  | 2                     | 0.2  | 2                  | 0.9  | 2            | 0.6  |                  |

|                                                |     |      |     |      |     |      |     |      |        |
|------------------------------------------------|-----|------|-----|------|-----|------|-----|------|--------|
| Ever hospital admission over the past 6 months |     |      |     |      |     |      |     |      |        |
| No                                             | 365 | 87.7 | 978 | 85.3 | 195 | 84.4 | 249 | 78.8 | 0.014  |
| Yes                                            | 47  | 11.3 | 163 | 14.2 | 34  | 14.7 | 62  | 19.6 |        |
| Missing                                        | 4   | 1.0  | 5   | 0.4  | 2   | 0.9  | 5   | 1.6  |        |
| Medical appointment in the next 6 months       |     |      |     |      |     |      |     |      |        |
| No                                             | 97  | 23.3 | 177 | 15.4 | 51  | 22.1 | 50  | 15.8 | 0.001  |
| Yes                                            | 315 | 75.7 | 965 | 84.2 | 180 | 77.9 | 261 | 82.6 |        |
| Missing                                        | 4   | 1.0  | 4   | 0.3  | 0   | 0.0  | 5   | 1.6  |        |
| Regular measurement of blood pressure          |     |      |     |      |     |      |     |      |        |
| No hypertension                                | 73  | 17.5 | 110 | 9.6  | 22  | 9.5  | 21  | 6.6  | <0.001 |
| Yes                                            | 242 | 58.2 | 721 | 62.9 | 123 | 53.2 | 249 | 78.8 |        |
| Not measure regularly                          | 99  | 23.8 | 307 | 26.8 | 85  | 36.8 | 42  | 13.3 |        |
| Missing                                        | 2   | 0.5  | 8   | 0.7  | 1   | 0.4  | 4   | 1.3  |        |
| Regular measurement of blood glucose           |     |      |     |      |     |      |     |      |        |
| No diabetes                                    | 302 | 72.6 | 760 | 66.3 | 155 | 67.1 | 235 | 74.4 | <0.001 |
| Yes                                            | 66  | 15.9 | 231 | 20.2 | 48  | 20.8 | 53  | 16.8 |        |
| Not measure regularly                          | 37  | 8.9  | 139 | 12.1 | 28  | 12.1 | 12  | 3.8  |        |
| Missing data                                   | 11  | 2.6  | 16  | 1.4  | 0   | 0.0  | 16  | 5.1  |        |
| Help available when needed                     |     |      |     |      |     |      |     |      |        |
| Yes                                            | 325 | 78.1 | 880 | 76.8 | 152 | 65.8 | 266 | 84.2 | <0.001 |
| No                                             | 91  | 21.9 | 262 | 22.9 | 79  | 34.2 | 40  | 12.7 |        |
| Missing                                        | 0   | 0.0  | 4   | 0.3  | 0   | 0.0  | 10  | 3.2  |        |
| Number of social media use in the past 2 weeks |     |      |     |      |     |      |     |      |        |
| 0                                              | 222 | 53.4 | 746 | 65.1 | 176 | 76.2 | 195 | 61.7 | <0.001 |

|                                          |     |      |      |      |     |      |     |      |        |
|------------------------------------------|-----|------|------|------|-----|------|-----|------|--------|
| 1                                        | 113 | 27.2 | 278  | 24.3 | 36  | 15.6 | 79  | 25.0 |        |
| >1                                       | 81  | 19.5 | 119  | 10.4 | 19  | 8.2  | 34  | 10.8 |        |
| Missing data                             | 0   | 0.0  | 3    | 0.3  | 0   | 0.0  | 8   | 2.5  |        |
| <b>Self-rated Health status in score</b> |     |      |      |      |     |      |     |      |        |
| High (67-100)                            | 220 | 52.9 | 282  | 24.6 | 42  | 18.2 | 142 | 44.9 | <0.001 |
| Middle (34-66)                           | 126 | 30.3 | 386  | 33.7 | 56  | 24.2 | 56  | 17.7 |        |
| Low (0-33)                               | 67  | 16.1 | 459  | 40.1 | 127 | 55.0 | 107 | 33.9 |        |
| Missing                                  | 3   | 0.7  | 19   | 1.7  | 6   | 2.6  | 11  | 3.5  |        |
| <b>Loneliness (measured by UCLA-3)</b>   |     |      |      |      |     |      |     |      |        |
| 0-5                                      | 388 | 93.3 | 980  | 85.5 | 112 | 48.5 | 268 | 84.8 | <0.001 |
| ≥6                                       | 28  | 6.7  | 165  | 14.4 | 119 | 51.5 | 43  | 13.6 |        |
| Missing                                  | 0   | 0.0  | 1    | 0.1  | 0   | 0.0  | 5   | 1.6  |        |
| <b>Memory loss</b>                       |     |      |      |      |     |      |     |      |        |
| No                                       | 143 | 34.4 | 288  | 25.1 | 66  | 28.6 | 63  | 19.9 | <0.001 |
| Yes, but not worry                       | 240 | 57.7 | 670  | 58.5 | 105 | 45.5 | 186 | 58.9 |        |
| Yes, and worry                           | 33  | 7.9  | 188  | 16.4 | 60  | 26.0 | 59  | 18.7 |        |
| Missing                                  | 0   | 0.0  | 0    | 0.0  | 0   | 0.0  | 8   | 2.5  |        |
| <b>Depression (measured by PHQ-2)</b>    |     |      |      |      |     |      |     |      |        |
| 0-2                                      | 409 | 98.3 | 1081 | 94.3 | 164 | 71.0 | 275 | 87.0 | <0.001 |
| ≥3                                       | 5   | 1.2  | 60   | 5.2  | 66  | 28.6 | 25  | 7.9  |        |
| Missing                                  | 2   | 0.5  | 5    | 0.4  | 1   | 0.4  | 16  | 5.1  |        |
| <b>Anxiety (measured by GAD-2)</b>       |     |      |      |      |     |      |     |      |        |
| 0-2                                      | 407 | 97.8 | 1093 | 95.4 | 171 | 74.0 | 286 | 90.5 | <0.001 |
| ≥3                                       | 6   | 1.4  | 51   | 4.5  | 56  | 24.2 | 12  | 3.8  |        |
| Missing                                  | 3   | 0.7  | 2    | 0.2  | 4   | 1.7  | 18  | 5.7  |        |

\*P-values in the chi-square test are calculated based on available data, not including “Missing”.
